# Supplementary material for: Rapid antibacterial activity of anodized aluminum-based materials impregnated with quaternary ammonium compounds for high-touch surfaces to limit transmission of pathogenic bacteria
Source: Royal Society of Chemistry journal article supplement (doi:10.1039/d1ra07159a), 2021-01-01
Supplement: d1ra07159a1.pdf [file d1ra07159a1.pdf]

## Electronic Supporting Information (ESI)

### Rapid antibacterial activity of anodized aluminum-based materials impregnated with quaternary ammonium compounds for high-touch surfaces to limit transmission of pathogenic bacteria

Jessica Jann <sup>a,b</sup>, Olivier Drevelle <sup>a</sup>, X. Grant Chen <sup>c</sup>, Myriam Auclair Gilbert <sup>d</sup>, Gervais Soucy <sup>a</sup>, Nathalie Faucheux <sup>\*a,b</sup>, and Louis Charles Fortier <sup>\*e</sup>

<sup>a</sup>. Department of Chemical and Biotechnological Engineering, Faculty of Engineering, Université de Sherbrooke, 2500 boul. de l'Université, Sherbrooke, Québec, J1K 2R1, Canada.

<sup>b</sup>. Clinical Research Center of Centre Hospitalier Universitaire de Sherbrooke, 12e Avenue N, Sherbrooke, Québec, J1H 5N4, Canada

<sup>c</sup>. Department of Applied Science, University of Quebec in Chicoutimi, Saguenay, Quebec, G7H 2B1, Canada

<sup>d</sup>. A3 Surfaces, 1433, Rue de la Manic, Chicoutimi, Québec, G7K 1G8, Canada

<sup>e</sup>. Department of Microbiology and Infectious Diseases, Faculty of Medicine and Health Sciences, Université de Sherbrooke, 3201 rue Jean Mignault, Sherbrooke, Québec, J1E 4K8, Canada.

\*Corresponding authors: Prof. Louis-Charles Fortier (Louis-Charles.Fortier@USherbrooke.ca) and Prof. Nathalie Faucheux ([Nathalie.Faucheux@USherbrooke.ca](mailto:Nathalie.Faucheux@USherbrooke.ca))

#### Contents:

**Table S1:** Characteristics of bacterial strains used in the present study

**Figure S1:** Manufacturing steps of A3S materials

**Figure S2:** Standard curve representing the absorbance ( $\lambda$ : 215 nm) in function of the concentration of QACs contained in the stock solution used for material impregnation

**Figure S3:** Sporicidal effect of impregnation solutions on *C. difficile* spores

**Figure S4:** Swab liquid-inoculation assay evaluating the antibacterial activity of different materials on *S. aureus*, *C. difficile* and streptomycin-resistant *S. typhimurium*.

**Figure S5:** Humid-transfer inoculation assay from contaminated gel evaluating the antibacterial activity of materials

**Figure S6:** Dry-transfer inoculation assay evaluating the antibacterial activity of materials after contact with a contaminated filter under low humidity conditions

**Figure S7:** Swab liquid-inoculation assay evaluating the sporicidal activity of the materials on *C. difficile* spores

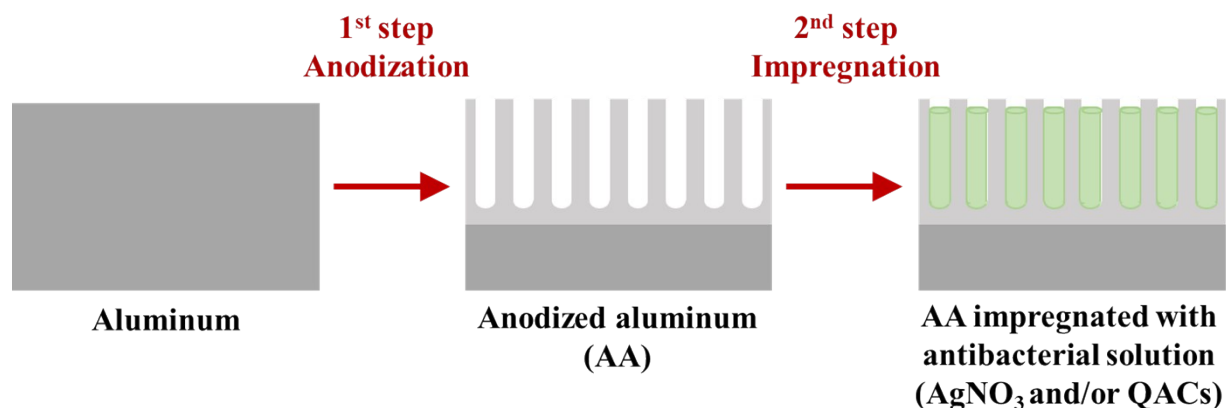

**Fig. S1:** Manufacturing of A3S materials:

**(1)** Anodization step: electrolytic process performed in an acid bath allows the formation of nanoporous anodic aluminium oxide, with controlled depth and diameter, on the surface of aluminum sample.

**(2)** Impregnation step: antibacterial solution (AgNO<sub>3</sub> and/or QACs) is incorporated into the nanopores, followed by a sealing process as final step.

**Table S1:** Characteristics of bacterial strains used in the present study

| Name                            | # Origin                      | Gram          | Morphology                  | Cellular dimension (average)       | E-test (resistance)     | Gene        | Culture Medium                         |
|---------------------------------|-------------------------------|---------------|-----------------------------|------------------------------------|-------------------------|-------------|----------------------------------------|
| <i>Staphylococcus aureus</i>    | ATCC # 29213                  | Gram-positive | Cocci (grape-like clusters) | 0.5-1.5 µm diameter                | -                       | -           | Mueller Hinton Agar/Broth              |
| <i>Clostridioides difficile</i> | Epidemic strains R20291       | Gram-positive | Bacilli                     | 1.0 µm wide by 3.0-4.0 µm long     | -                       | -           | Tryptone Yeast extract (TY) Agar/Broth |
| <i>Enterococcus faecium</i>     | Clinical from CHUS #422       | Gram-positive | Cocci                       | 0.6-2.5 µm diameter                | Vancomycin: > 256 µg/ml | <i>VanA</i> | Brain Heart Infusion (BHI) Agar/Broth  |
| <i>Enterococcus faecalis</i>    | Clinical from CHUS #55        | Gram-positive | Cocci                       | 0.6-2.5 µm diameter                | Vancomycin: 8 µg/ml     | <i>VanB</i> | BHI Agar/Broth                         |
| <i>Klebsiella pneumoniae</i>    | Clinical from CHUS #455814871 | Gram-negative | Capsulated bacilli          | 0.3-0.8 µm wide by 1.0-3.0 µm long | -                       | -           | Mueller Hinton Agar/Broth              |
| <i>Escherichia coli</i>         | ATCC # 29532                  | Gram-negative | Bacilli                     | 1.0 µm wide by 1.0-2.0 µm long     | -                       | -           | Luria-Bertani (LB) Agar/Broth          |
| <i>Salmonella typhimurium</i>   | SL1344                        | Gram-negative | Bacilli                     | 0.7-1.5 µm wide by 2.2-5.0 µm long | Streptomycin: 100 µg/ml | -           | LB Agar/Broth + 100 µg/ml Streptomycin |

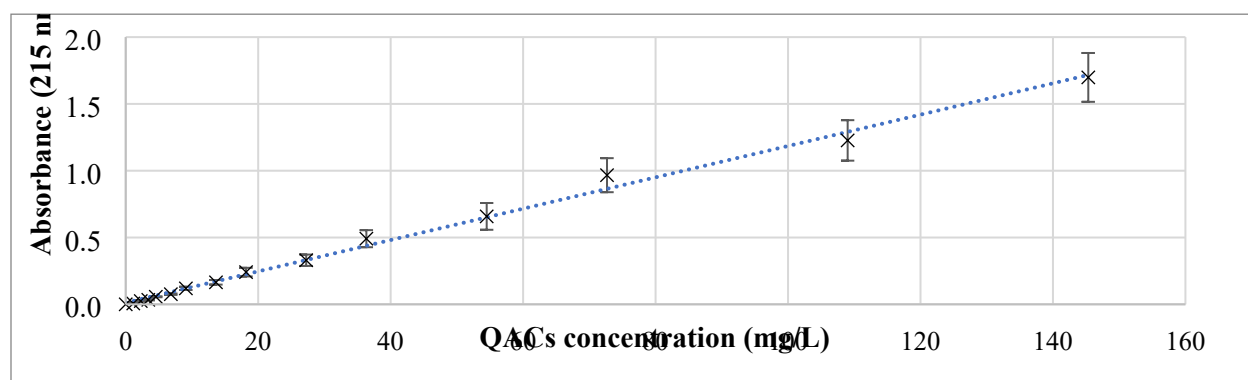

**Fig. S2:** Standard curve representing the absorbance at a wavelength ( $\lambda$ ) of 215 nm in function of the concentration of QACs contained in the stock solution used for material impregnation. The coefficient of determination  $R^2 = 0.9948$ , of the standard curve  $y = 0.0117x + 0.012$ , demonstrates the good reliability of this linear regression model. Results are means  $\pm$  SEM (n=5; N=15).

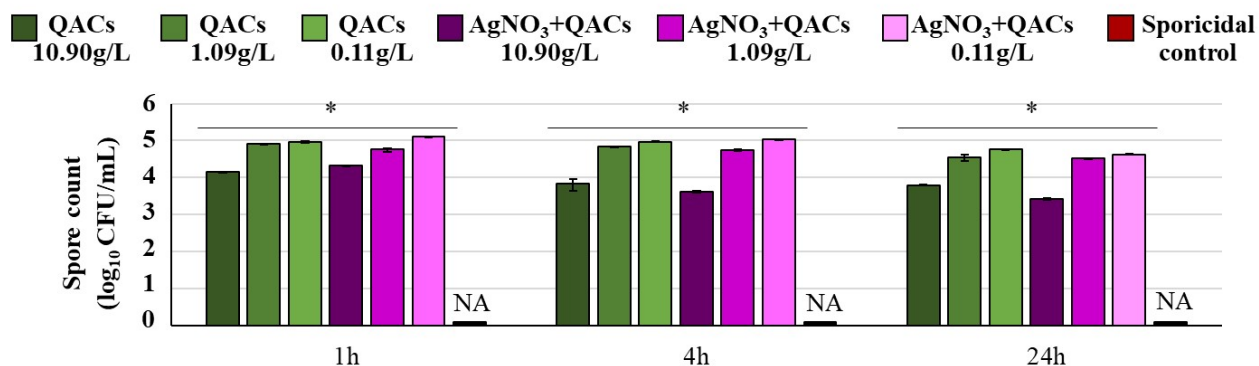

**Fig. S3:** Sporicidal effect of impregnation solutions (QACs and AgNO<sub>3</sub>+QACs) on *C. difficile* spores. From an initial inoculum of  $\approx 1.6 \times 10^5$  spores/mL, the number of surviving spores was determined following a contact of 1, 4 and 24 h with impregnation solutions (QACs and AgNO<sub>3</sub>+QACs) and sporicidal control (1/16 (v/v): Virox™5/water). Results are means  $\pm$  SEM (n=4; N=16). Significant effect compared to sporicidal control: \*p<0.001; NA: no spore counted.

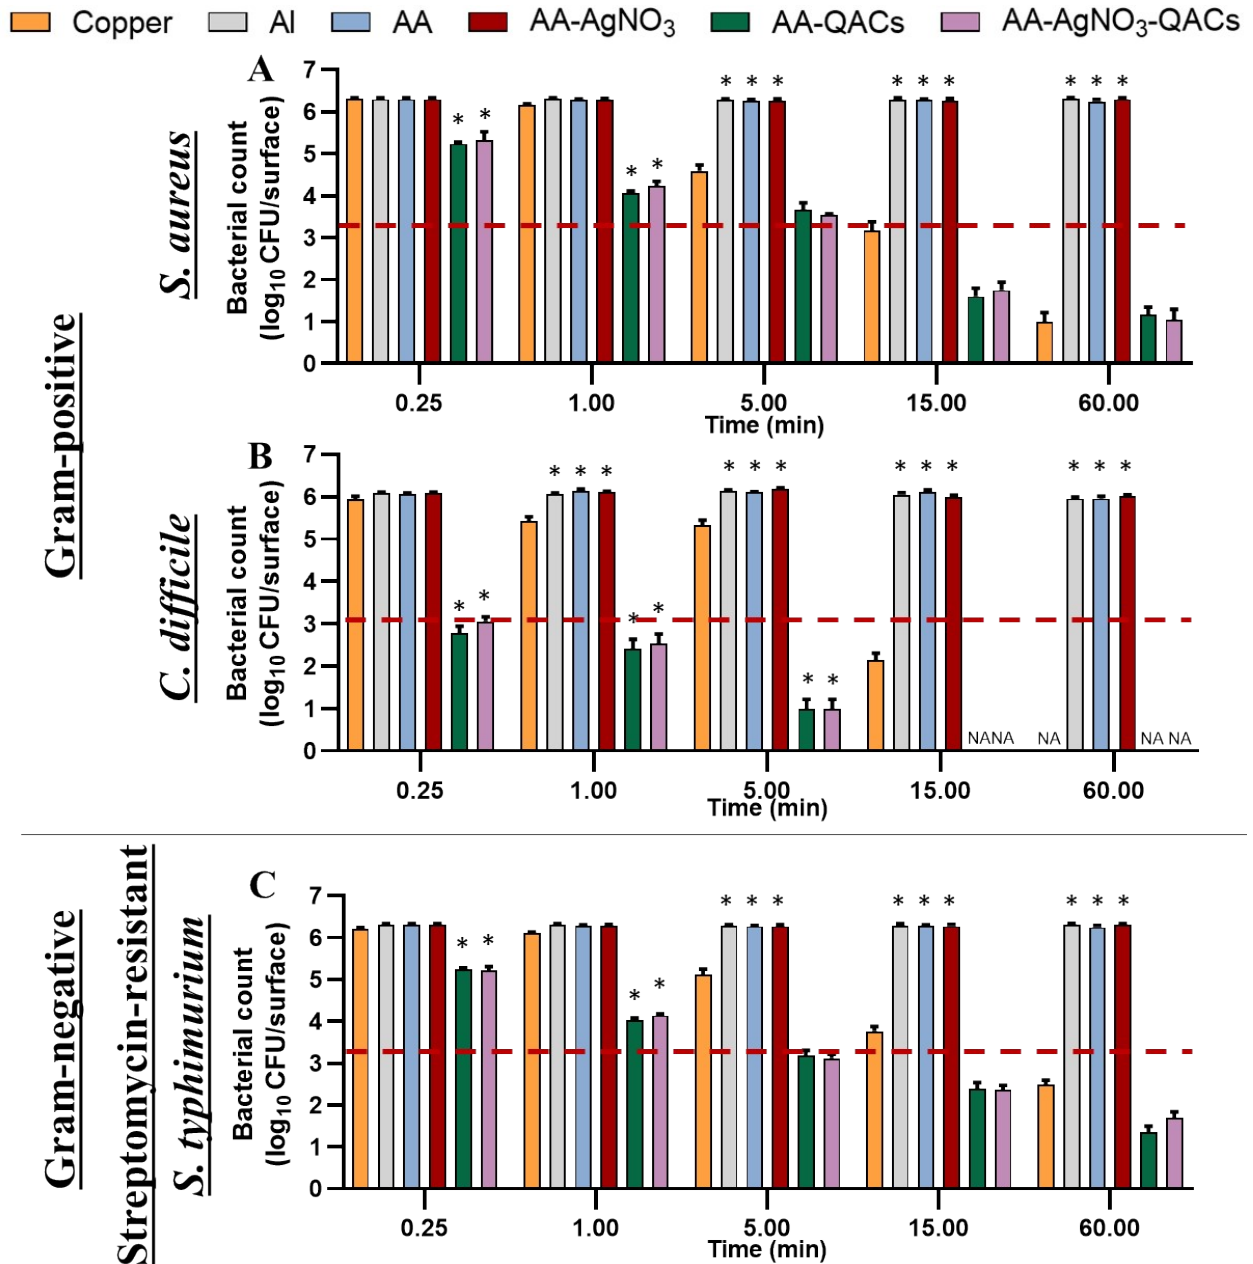

**Fig. S4:** Swab liquid-inoculation assay evaluating the antibacterial activity of different materials on *S. aureus*, *C. difficile* and streptomycin-resistant *S. typhimurium*. The reference of 99.9% antibacterial activity is indicated by the dotted red line. Results are means  $\pm$  SEM (n=2; N=8). Statistical effect compared to copper: \* p < 0.001; NA: no bacteria counted.

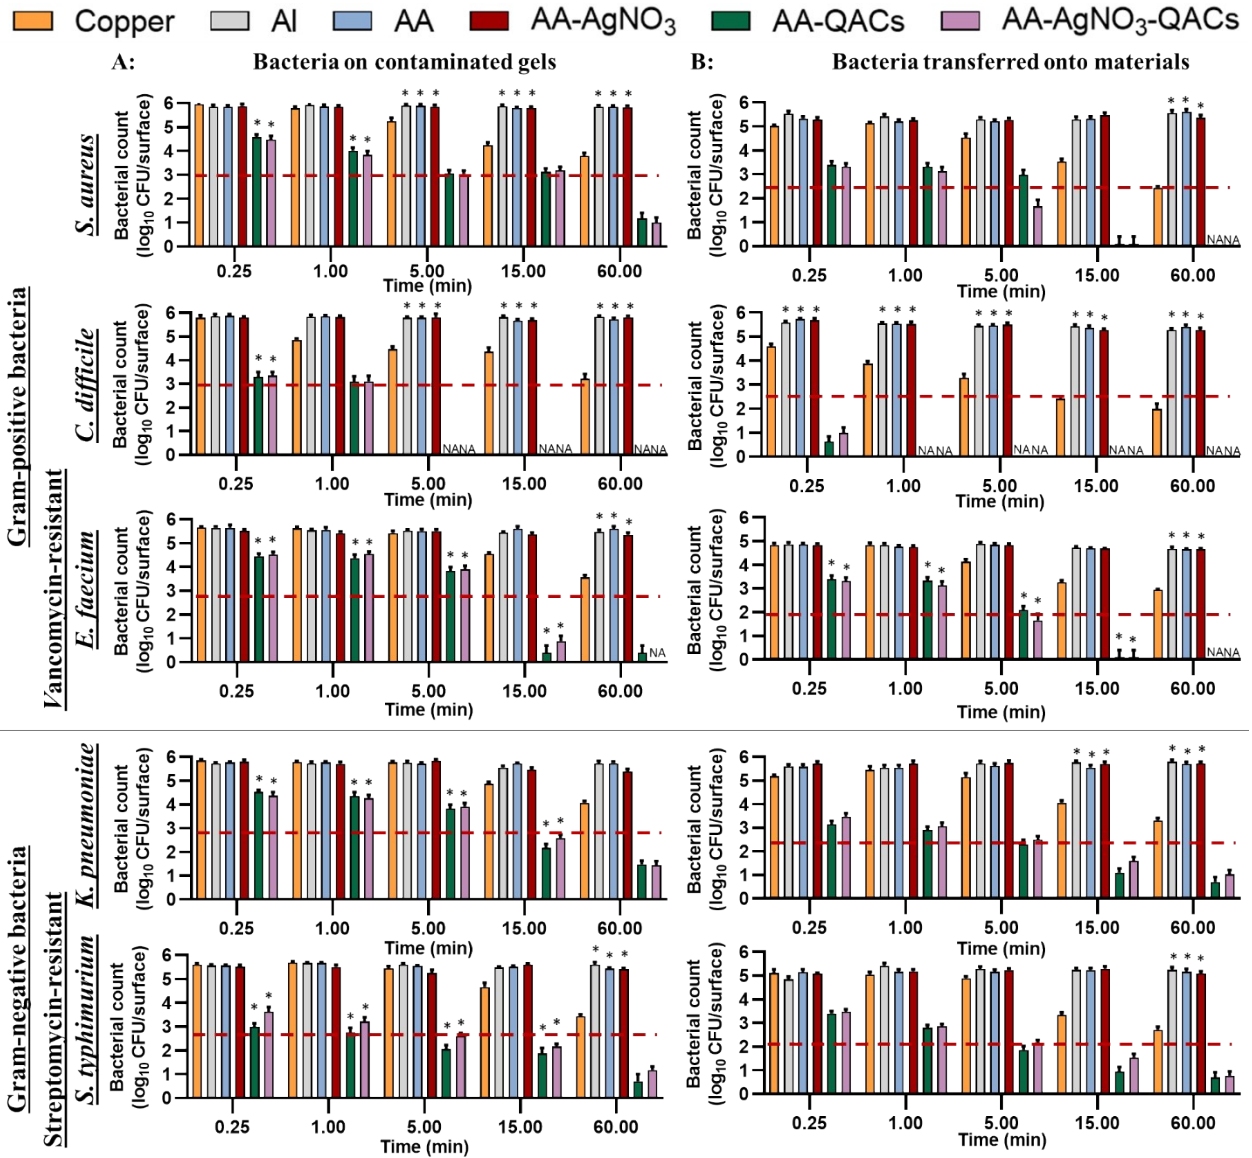

**Fig. S5:** Humid-transfer inoculation assay from contaminated gel evaluating the antibacterial activity of materials. The graph shows total counts of bacteria that survived **(A)** on the gel or **(B)** after transfer from the gel to the different materials. The reference of 99.9% antibacterial activity is indicated by the dotted red line. Results are means  $\pm$  SEM (n=2; N=8). Statistical significance when compared to copper: \* p<0.001; NA: no bacteria counted.

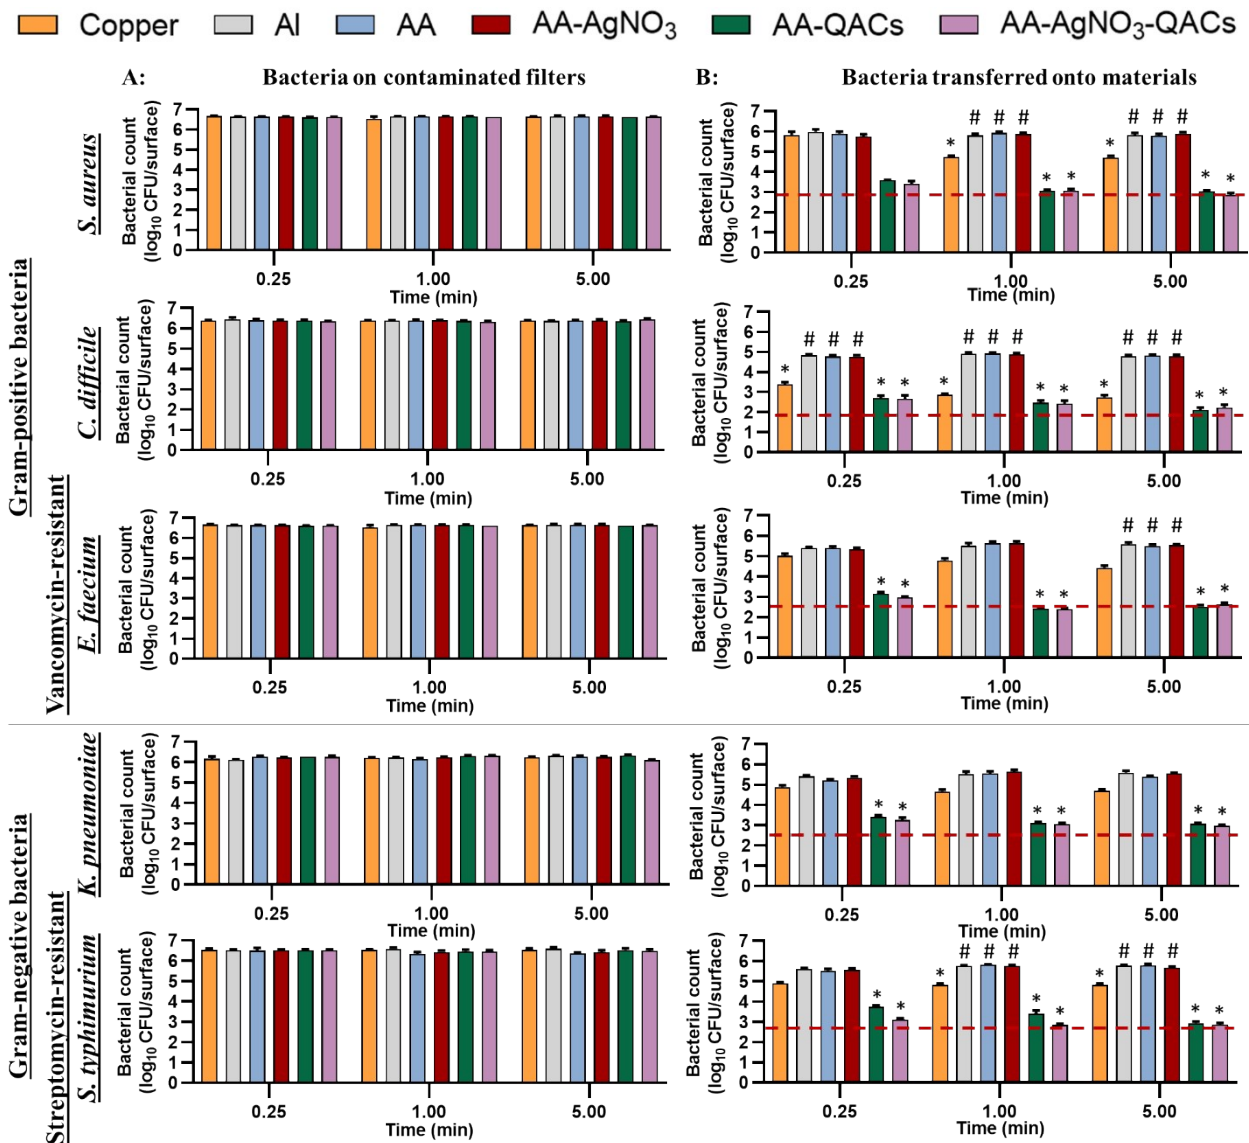

**Fig. S6:** Dry-transfer inoculation assay evaluating the antibacterial activity of materials after contact with a contaminated filter under low humidity conditions. Counts in log<sub>10</sub> CFU/surface indicate the number of bacteria that survived on **(A)** the contaminated filters and **(B)** the materials, after transfer from the filter. Results are means ± SEM (n=2; N=8). Statistical effect compared to AA: \*p<0.001 and to copper: #p<0.001.

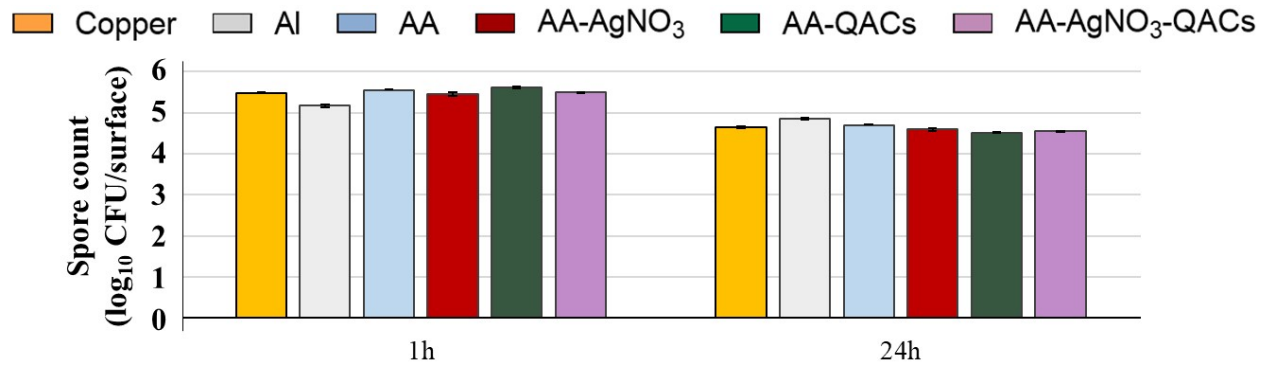

**Fig. S7:** Swab liquid-inoculation assay evaluating the sporicidal activity of the materials on *C. difficile* spores following a contact of 1 and 24 h. Results are means  $\pm$  SEM (n=3; N=12). No statistical effect was observed.
